# Supplementary material for: Patient treatment and outcome after breast cancer orbital and periorbital metastases: a comprehensive case series including analysis of lobular versus ductal tumor histology
Source: Springer Nature journal article supplement (doi:10.1186/s13058-020-01309-3), 2020-06-26
Supplement: MOESM1 [file 18123402]

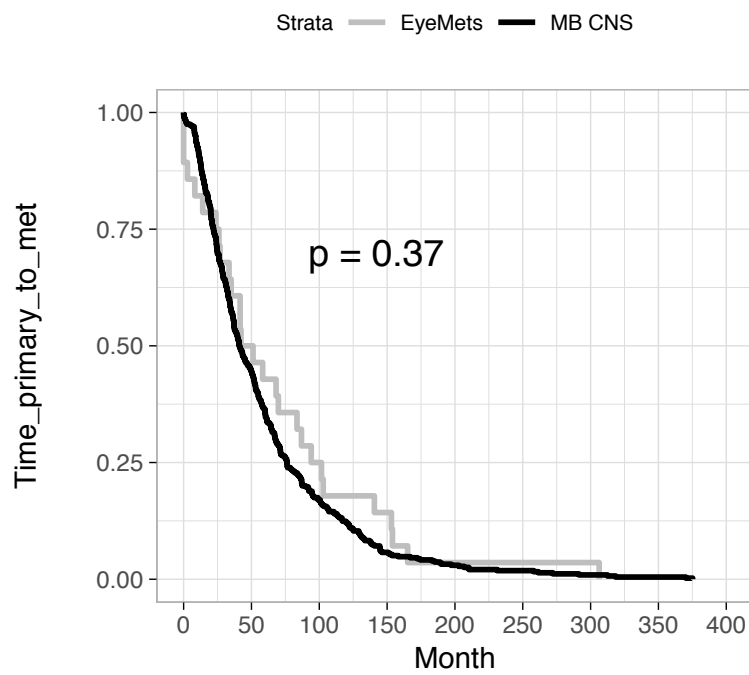

Number at risk

| Strata | EyeMets | 28  | 14  | 7  | 4  | 1  | 1 | 1 | 0 | 0 |
|--------|---------|-----|-----|----|----|----|---|---|---|---|
| MB CNS |         | 435 | 194 | 74 | 25 | 13 | 8 | 4 | 2 | 0 |

Month

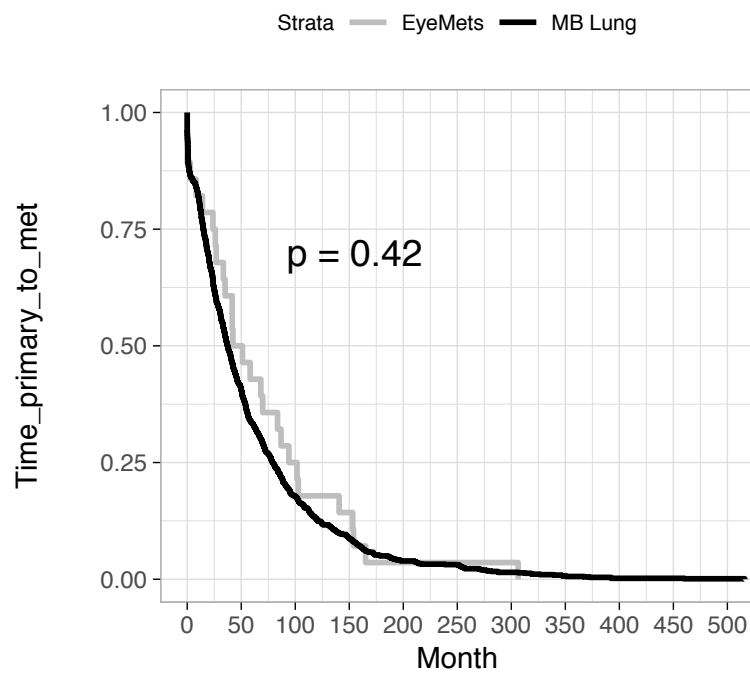

Number at risk

| Strata  | EyeMets | 28   | 14  | 7   | 4  | 1  | 1  | 1  | 0 | 0 | 0 | 0 |
|---------|---------|------|-----|-----|----|----|----|----|---|---|---|---|
| MB Lung |         | 1022 | 414 | 182 | 90 | 40 | 32 | 15 | 7 | 2 | 2 | 1 |

Month

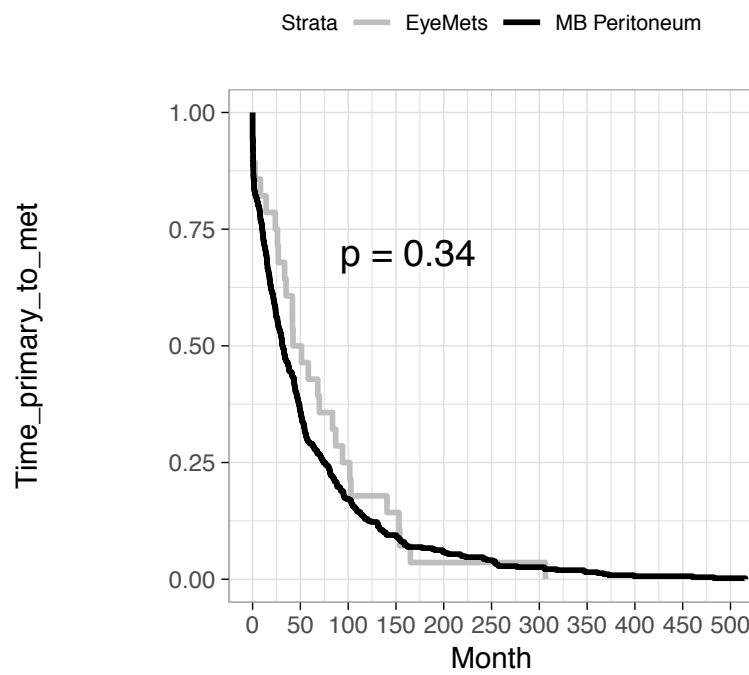

Number at risk

| Strata        | EyeMets | 28  | 14  | 7  | 4  | 1  | 1  | 1  | 0 | 0 | 0 | 0 |
|---------------|---------|-----|-----|----|----|----|----|----|---|---|---|---|
| MB Peritoneum |         | 465 | 167 | 80 | 44 | 27 | 19 | 12 | 7 | 3 | 3 | 1 |

Month

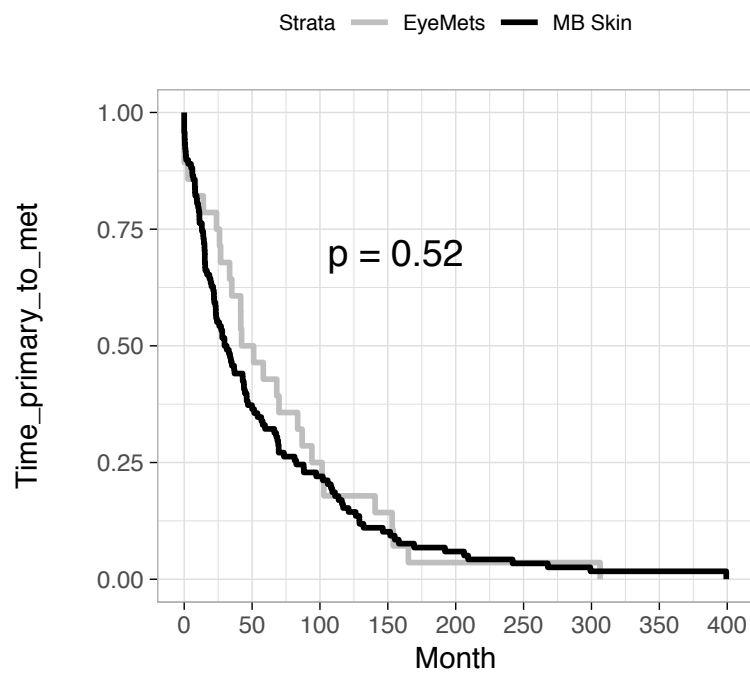

Number at risk

| Strata  | EyeMets | 28  | 14 | 7  | 4  | 1 | 1 | 1 | 0 | 0 |
|---------|---------|-----|----|----|----|---|---|---|---|---|
| MB Skin |         | 118 | 44 | 26 | 12 | 7 | 4 | 2 | 2 | 0 |

Month

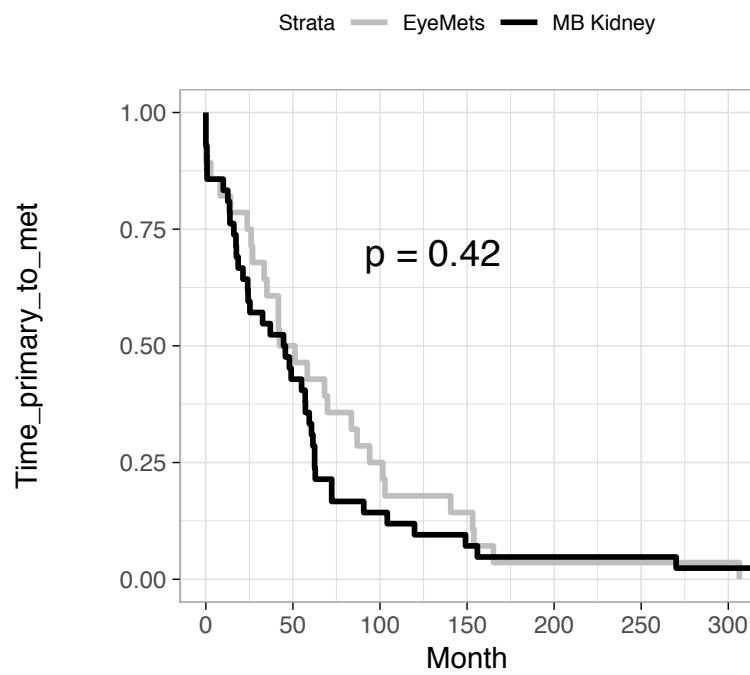

Number at risk

| Strata    | EyeMets | 28 | 14 | 7 | 4 | 1 | 1 | 1 |
|-----------|---------|----|----|---|---|---|---|---|
| MB Kidney |         | 42 | 18 | 6 | 3 | 2 | 2 | 1 |

Month

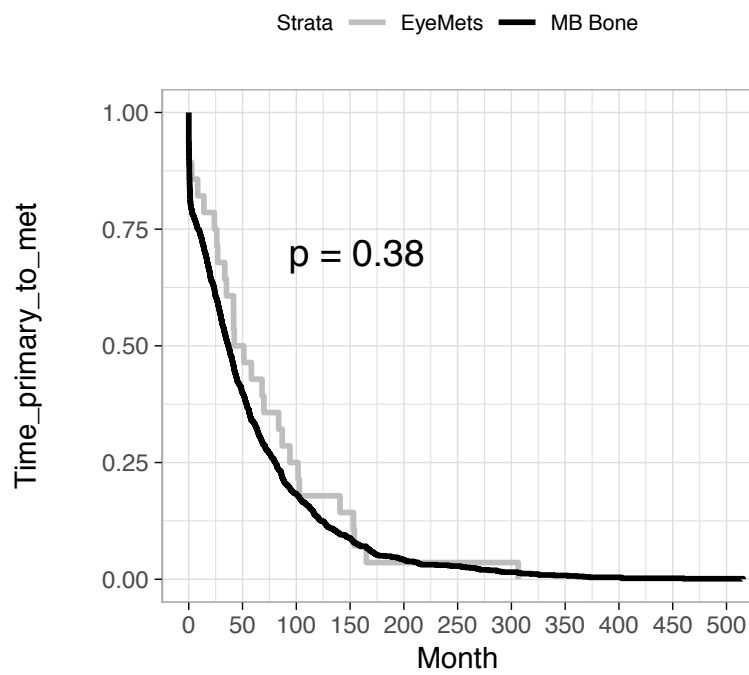

Number at risk

| Strata  | EyeMets | 28  | 14  | 7   | 4  | 1  | 1  | 1  | 0 | 0 | 0 | 0 |
|---------|---------|-----|-----|-----|----|----|----|----|---|---|---|---|
| MB Bone |         | 996 | 397 | 182 | 88 | 42 | 28 | 15 | 8 | 4 | 2 | 1 |

Month

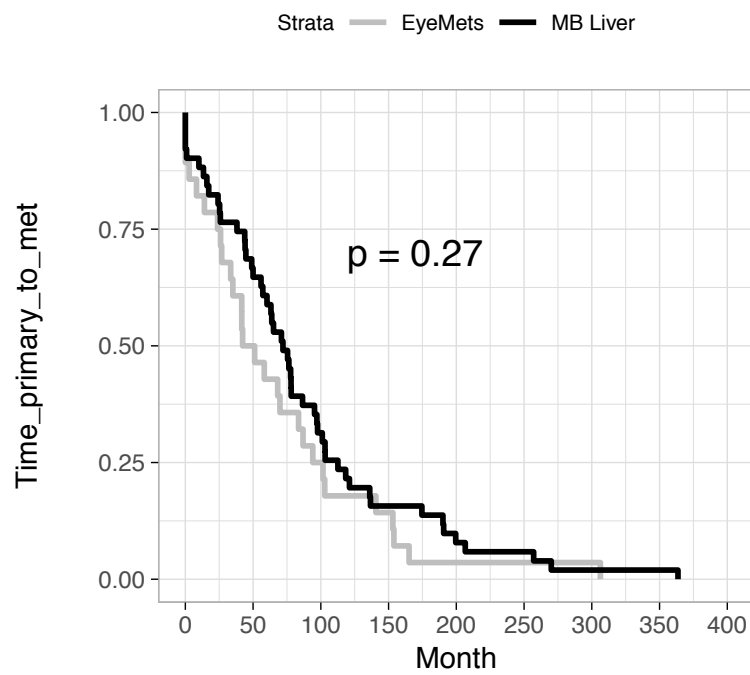

Number at risk

| Strata   | EyeMets | 28 | 14 | 7  | 4 | 1 | 1 | 1 | 0 | 0 |
|----------|---------|----|----|----|---|---|---|---|---|---|
| MB Liver |         | 51 | 33 | 16 | 8 | 4 | 3 | 1 | 1 | 0 |

Month

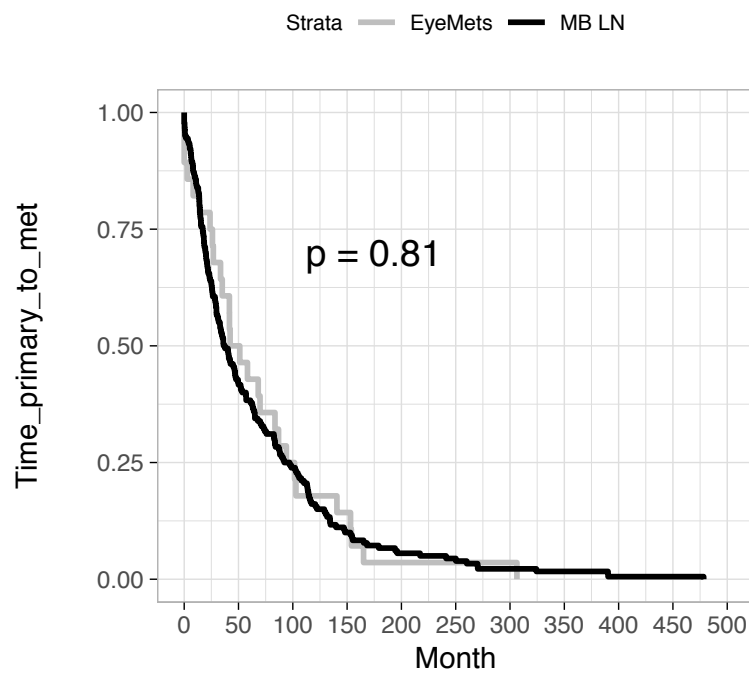

Number at risk

| Strata | EyeMets | 28  | 14 | 7  | 4  | 1  | 1 | 1 | 0 | 0 | 0 | 0 |
|--------|---------|-----|----|----|----|----|---|---|---|---|---|---|
| MB LN  |         | 180 | 75 | 43 | 18 | 10 | 8 | 4 | 3 | 1 | 1 | 0 |

Month

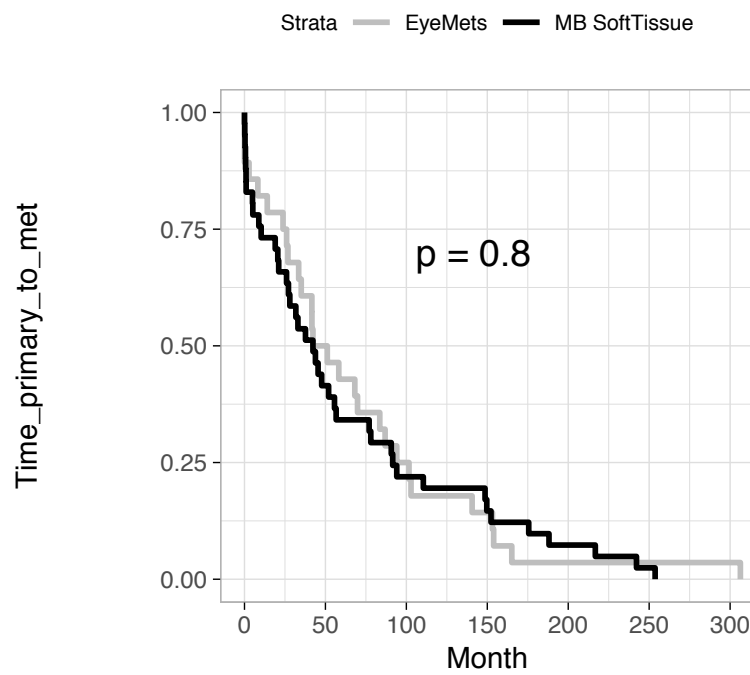

Number at risk

| Strata        | EyeMets | 28 | 14 | 7 | 4 | 1 | 1 | 1 |
|---------------|---------|----|----|---|---|---|---|---|
| MB SoftTissue |         | 41 | 17 | 9 | 6 | 3 | 1 | 0 |

Month

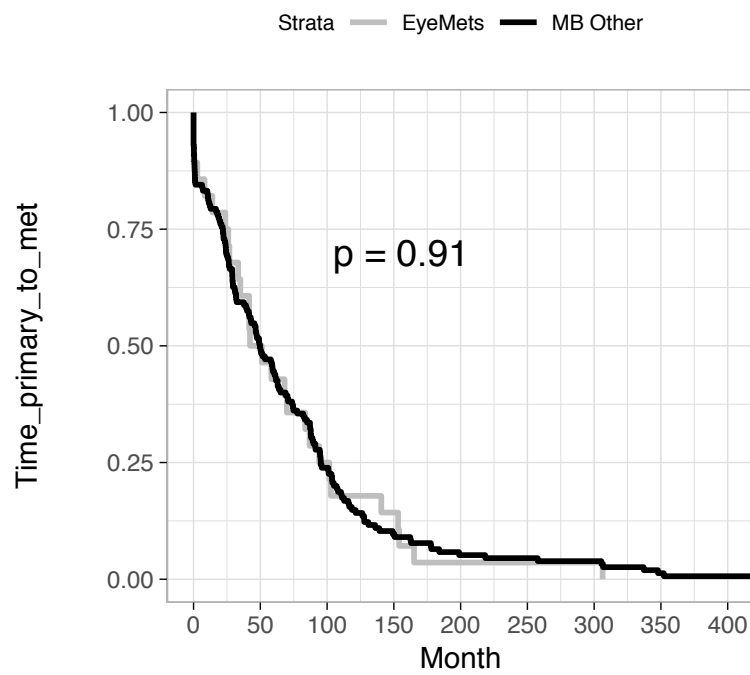

Number at risk

| Strata   | EyeMets | 28  | 14 | 7  | 4  | 1 | 1 | 1 | 0 | 0 |
|----------|---------|-----|----|----|----|---|---|---|---|---|
| MB Other |         | 155 | 77 | 37 | 15 | 8 | 7 | 6 | 2 | 1 |

Month
